# Supplementary material for: Breast milk donation after neonatal death in Australia: a report
Source: Springer Nature journal article supplement (doi:10.1186/s13006-014-0023-4), 2014-11-29
Supplement: MOESM3 [file 9772508]

Table 3: Stakeholder identified key practice issues for milk donation after neonatal death

| **Theme** | **Implications for practice** |
| --- | --- |
| The spectrum of milk donation | Accept that all women experience lactation and donation differently |
| The quality of donated milk | Milk banks are responsible for providing safe and appropriate breast milk to recipients |
| Caring for the bereaved donor | Accept that all women grieve differently  Ensure that bereaved mother’s welfare is a priority  Suggest broader support networks for bereaved mothers who are donors |
| Women’s autonomy | Attend to the commonalities between bereaved mothers and non-bereaved mothers as donors when screening and assessing suitability, while accommodating the special needs associated with bereaved mothers  Avoid judgement of women’s lactation and donation decisions after infant death |
| Approaching bereaved mothers about donation | Provide bereaved mother with the option of milk donation, when available |
| Spread too thin | Provide donation guidelines or information on further support in cases where no HMB is available or if donation does not fit within guidelines |
| Four categories of milk donation after neonatal death | Bereaved mothers have different patterns of milk donation. These may need to be considered with regard to individual milk banking guidelines |
